# Supplementary material
Source: publisher figshare collection journal article supplement (https://acs.figshare.com/ndownloader/files/31081795)
Supplement: Supplementary file 1 [file 31081795]

# Supporting information

Ultrathin MOF Coupling with Molecular Cobaloxime to Construct an Efficient Hybrid Hematite Photoanode for Photocatalytic Water Splitting

*Taotao Wang,<sup>a</sup> Hongyun Cao,<sup>a</sup> Ming Huang,<sup>a</sup> Pingwu Du<sup>\* a,b</sup>*

<sup>a</sup> Hefei National Laboratory for Physical Sciences at Microscale, CAS Key Laboratory of Materials for Energy Conversion, Department of Materials Science and Engineering, iChEM (Collaborative Innovation Center of Chemistry for Energy Materials), University of Science and Technology of China (USTC), 96 Jinzhai Road, Hefei, Anhui Province, 230026, P. R. China.

<sup>b</sup> National Synchrotron Radiation Laboratory, University of Science and Technology of China (USTC), 443 Huangshan Rd, Hefei, Anhui Province 230029 (China).

\*Corresponding author: [dupingwu@ustc.edu.cn](mailto:dupingwu@ustc.edu.cn)

Tel/Fax: 86-551-63606207

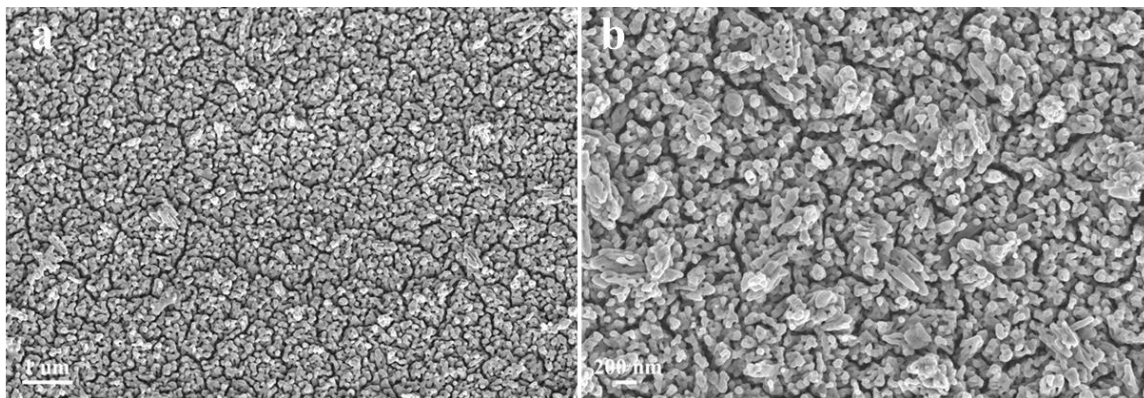

**Figure S1.** SEM images of Ti-PH.

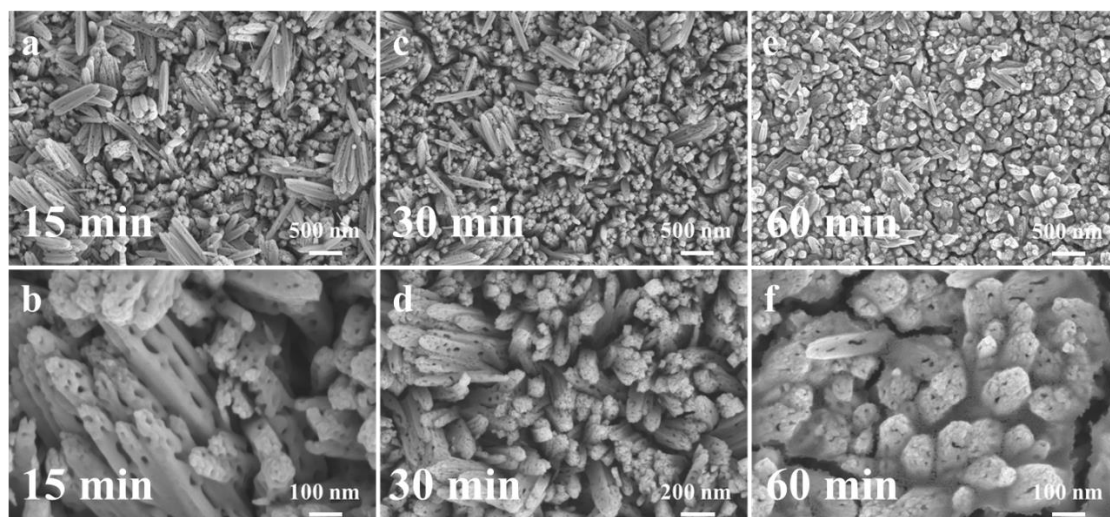

**Figure S2.** SEM images of Ti-PH/MOF with different reaction time.

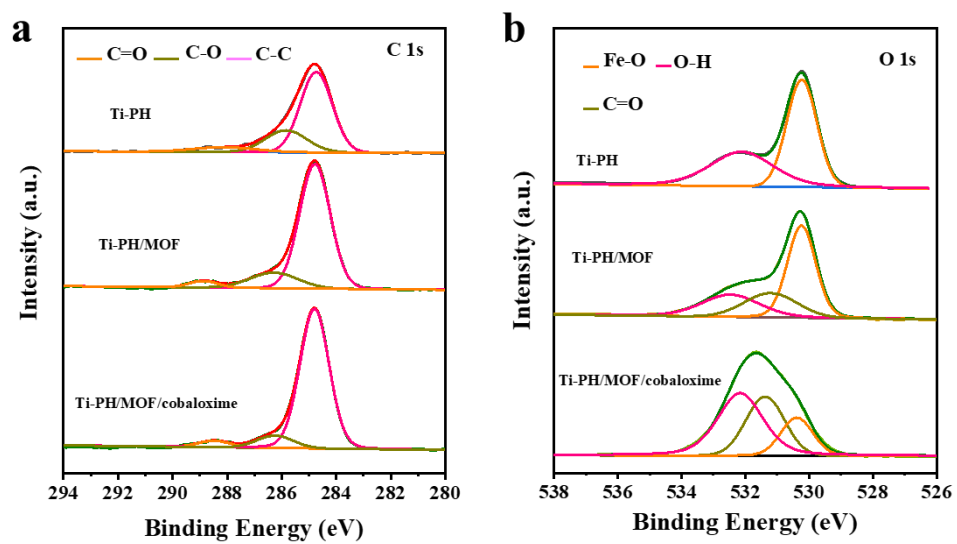

**Figure S3.** (a) C 1s, (b) O 1s XPS spectra of the three photoanodes.

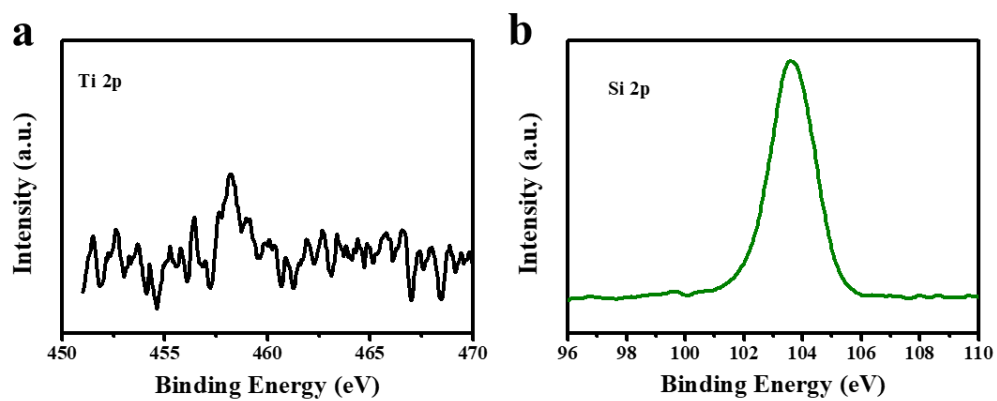

**Figure S4.** (a) Ti 2p, (b) Si 2p XPS spectra of Ti-PH

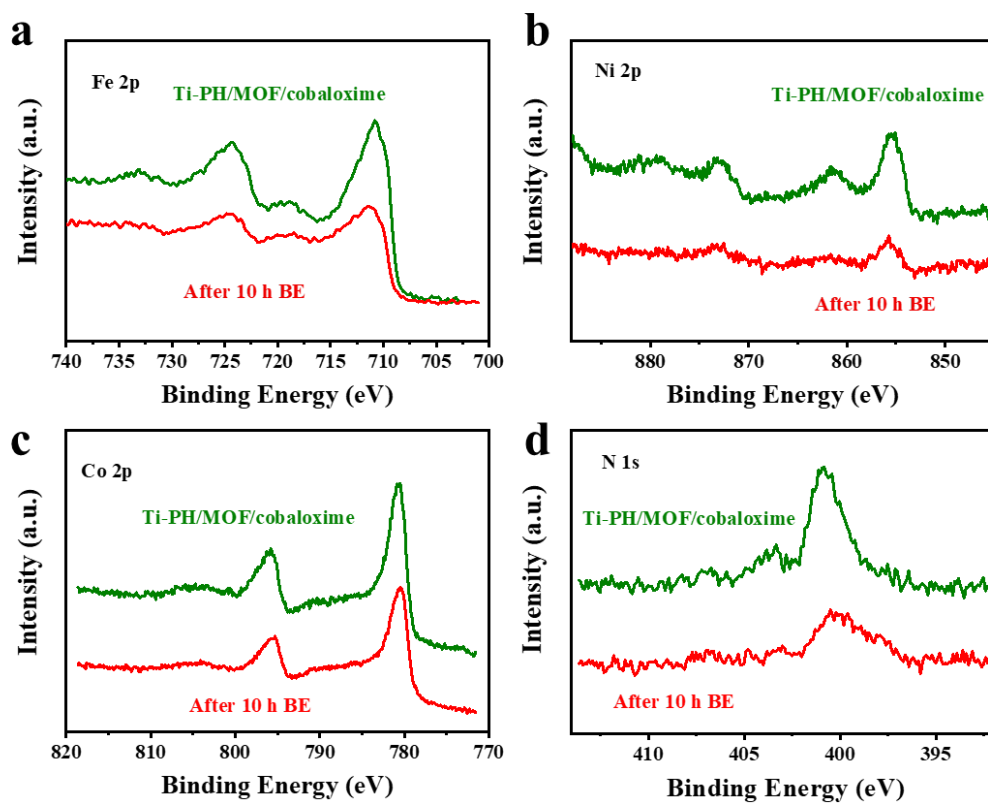

**Figure S5.** XPS data of Ti-PH/MOF/cobaloxime before and after 10 hours bulk electrolysis at 1.23 V vs. RHE under illumination.

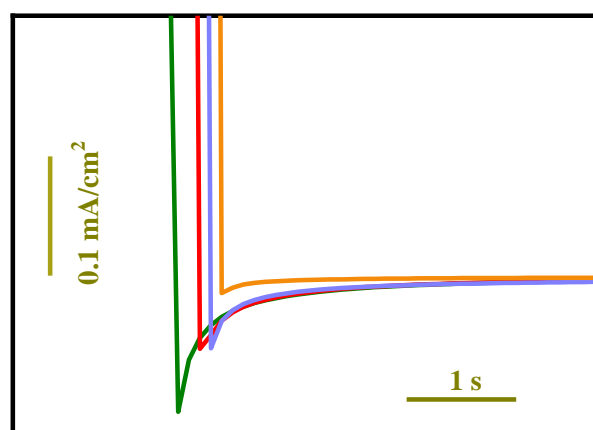

**Figure S6.** Current–time curves of the blue oval area in Figure 3c.

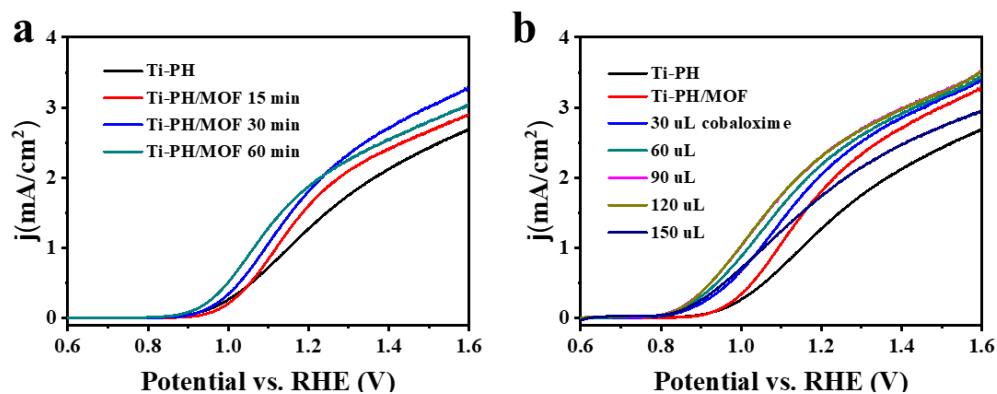

**Figure S7.** (a) Comparison of the LSV of Ti-PH/MOF with different reaction time, (b) comparison of the LSV of Ti-PH/MOF/cobaloxime with various drop volumes.



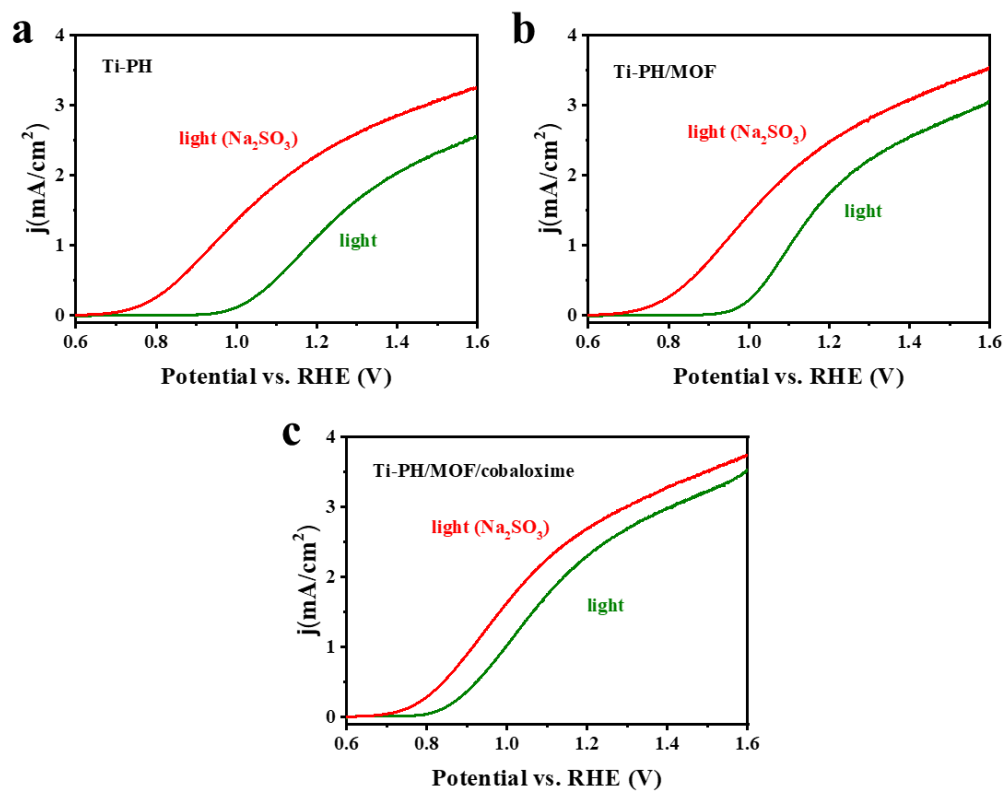

**Figure S8.** LSV curves of (a) Ti-PH, (b) Ti-PH/MOF, (c) Ti-PH/MOF/cobaloxime photoanode measured in 1.0 NaOH solution with (red line) and without (green line) 0.5 M Na<sub>2</sub>SO<sub>3</sub> as a hole scavenger.

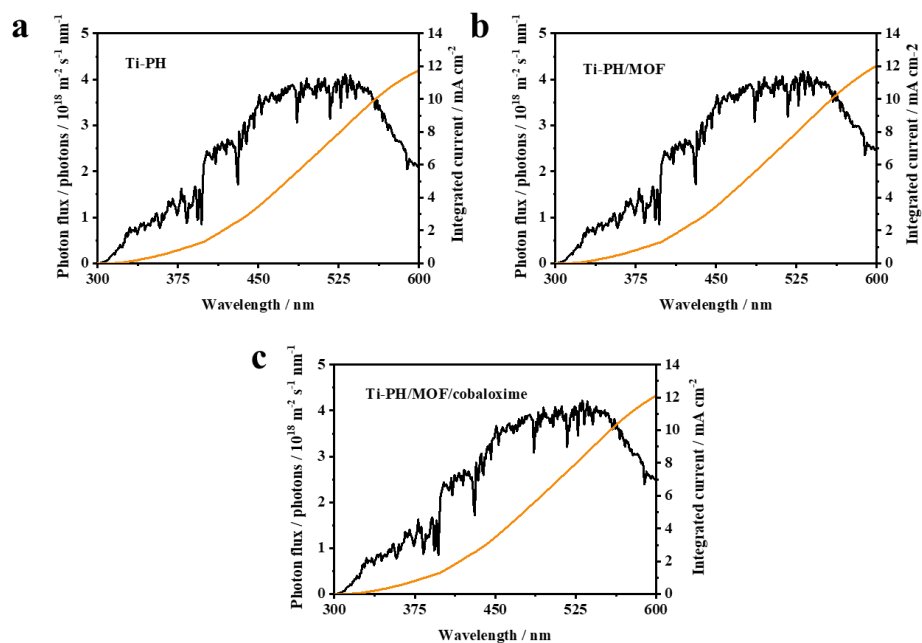

**Figure S9.**  $J_{\text{abs}}$  values of all composite photoanodes (APCE=100 %).

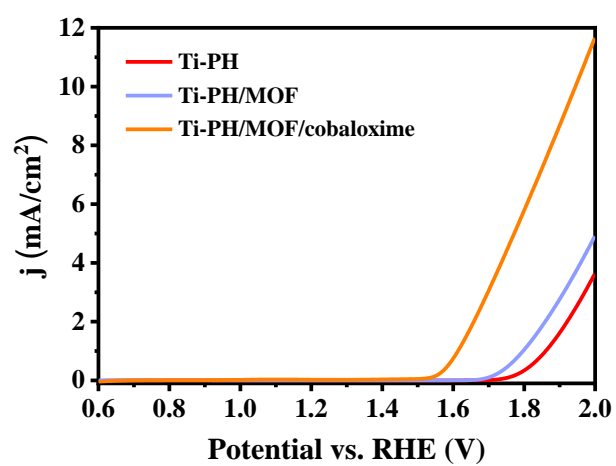

**Figure S10.** LSV curves of Ti-PH, Ti-PH/MOF, Ti-PH/MOF/cobaloxime in the dark.

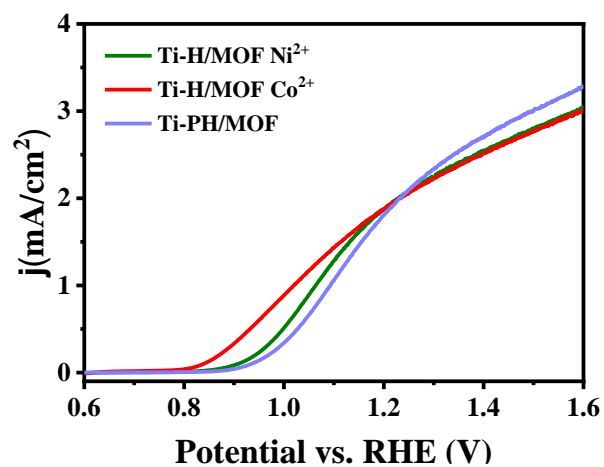

**Figure S11.** LSV curves of Ti-PH/NiFe MOF/50 nmol Ni<sup>2+</sup>, Ti-PH/NiFe MOF/100 nmol Co<sup>2+</sup>, and Ti-PH/NiFe MOF photoanodes.

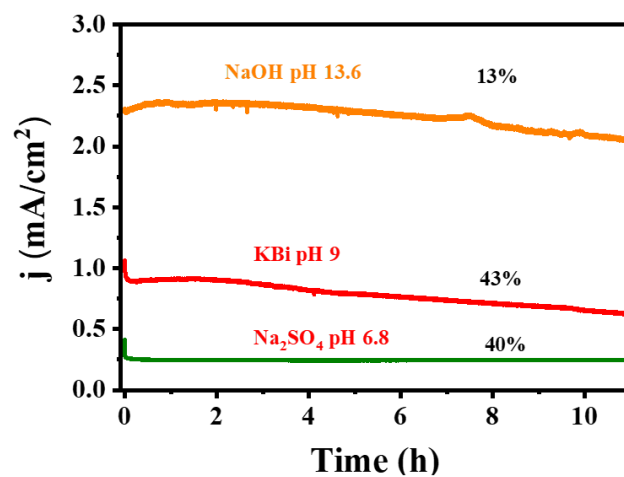

**Figure S12.** Long-term stability curves at 1.23 V vs. RHE of the Ti-PH/NiFe MOF/cobaloxime photoanode in 1 M NaOH (pH 13.6), 1 M KBi (pH 9), and 0.1 M  $\text{Na}_2\text{SO}_4$  (pH 6.8).

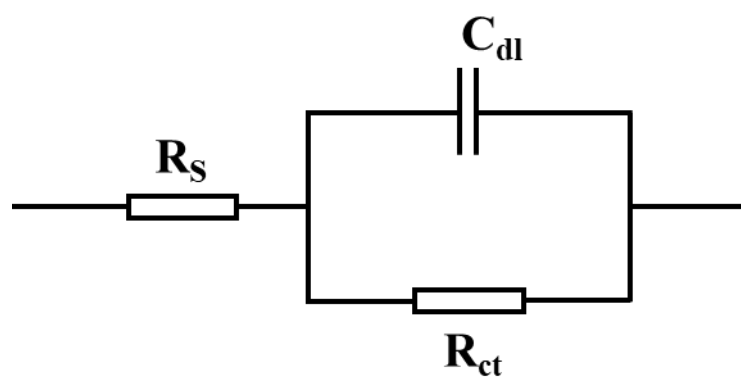

**Figure S13.** Equivalent electric circuit fitting from the EIS curve.

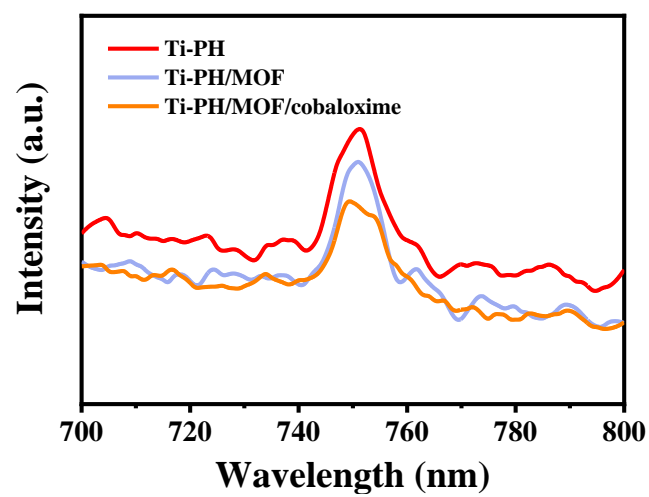

**Figure S14.** Photoluminescence spectra of all prepared samples.

**Table S1.** The fitting results using the equivalent model for EIS measurements.

| Sample                       | RS    | Rct  |
|------------------------------|-------|------|
| Ti-PH                        | 33.18 | 3235 |
| Ti-PH/NiFe MOF               | 35.38 | 2609 |
| Ti-PH/NiFe<br>MOF/cobaloxime | 24.07 | 2029 |



**Table S2.** The Ni and Co contents in the Ti-PH/NiFe MOF/cobaloxime samples before and after 10 h bulk electrolysis at 1.23 V vs. RHE under illumination.

| Sample      | Ni (wt%) | Co (wt%) |
|-------------|----------|----------|
| Before test | 0.85     | 3.4      |
| After test  | 0.57     | 1.8      |

**Table S3.** The comparison of PEC performances between the Ti-PH/NiFe MOF/cobaloxime photoanode and other previously reported hematite photoanodes under AM 1.5 illumination (100 mW cm<sup>-2</sup>).

| Photoanodes                                                               | J (mA/cm <sup>2</sup> )<br>@1.23 V <sub>RHE</sub> | Onset<br>potential | IPCE               | Stability                                      | Reference                                                  |
|---------------------------------------------------------------------------|---------------------------------------------------|--------------------|--------------------|------------------------------------------------|------------------------------------------------------------|
| Fe <sub>2</sub> O <sub>3</sub> /FeB                                       | 1.65                                              | ~0.9               | 60% (at 380)       | 5 h (at 1.23 V <sub>RHE</sub> )                | <i>J. Catal.</i> , 2017, 352, 113-119                      |
| Ti-PH/CoP                                                                 | 2.1                                               | 0.77               | ~42% (at 360 nm)   | 3 h (8.9% decay at 1.23 V <sub>RHE</sub> )     | <i>J. Catal.</i> , 2018, 366, 275-281                      |
| Fe <sub>2</sub> O <sub>3</sub> /Fe <sub>2</sub> TiO <sub>5</sub> /FeNiOOH | 2.2                                               | ~1.0               | 28.7% (at 350 nm)  | 2 h (at 1.23 V <sub>RHE</sub> )                | <i>Energy Environ. Sci.</i> , 2017, 10, 2124-2136          |
| α-Fe <sub>2</sub> O <sub>3</sub> /Co-Mn Nanosheets                        | 2.09                                              | ~0.7               | 39.1 (at 360 nm)   | 10 h (3% decay at 1.23 V <sub>RHE</sub> )      | <i>Adv. Funct. Mater.</i> , 2019, 29, 1904622              |
| Fe <sub>2</sub> O <sub>3</sub> :Ti/NH <sub>2</sub> -MIL-101(Fe)           | 2.27                                              | 0.92               | 42.3 (at 365 nm)   | 2500 s (13.3% decay at 1.23 V <sub>RHE</sub> ) | <i>Appl. Catal. B: Environ.</i> , 2018, 237, 9-17          |
| F-Fe <sub>2</sub> O <sub>3</sub> /CoAl-LDH                                | 2.46                                              | ~0.72              | 47.66% (at 300 nm) | 6 h (10% decay at 1.23 V <sub>RHE</sub> )      | <i>ACS Appl. Mater. Interfaces</i> , 2019, 11, 29799-29806 |
| α-Fe <sub>2</sub> O <sub>3</sub> /NiFe-phosphate                          | 1.2                                               | 0.74               | 28.7% (at 340 nm)  | 5.5 h (at 1.23 V <sub>RHE</sub> )              | <i>ACS Sustainable Chem. Eng.</i> , 2018, 6, 2353-2361     |
| Zn- Fe <sub>2</sub> O <sub>3</sub> /FeNiO <sub>x</sub>                    | ~0.68                                             | ~0.8               | -                  | -                                              | <i>ACS Catal.</i> , 2018, 8, 2754-2759                     |
| Co-Pi/WRCN/Hematite                                                       | 2.14                                              | ~0.9               | ~28 (380 nm)       | 2 h (at 1.23 V <sub>RHE</sub> )                | <i>J. Phys. Chem. C</i> , 2021, 125, 13273-13282           |
| Zr-doped Hematite                                                         | ~1.48                                             | 0.87               | 20.91% (at 350 nm) | 1 h (at 1.23 V <sub>RHE</sub> )                | <i>Chem. Eng. J.</i> , 2020, 390, 124504                   |
| Ti-PH/NiFe MOF/cobaloxime                                                 | 2.45                                              | 0.78               | 83.0% (at 365 nm)  | 6 h (2% decay at 1.23 V <sub>RHE</sub> )       | This work                                                  |
